# Supplementary material
Source: PubMed Central journal article supplement (PMC4867440)

**Table S1. Variation observed in *ABCA1* for phenotypic extreme samples and population-based samples.**

Position is mapped to the human genome reference hg19, transcript NM\_005502.3, codon changes are in reference to ENST00000374736.3 and protein changes are in reference to ENSP00000363868.3.

| Position Chr9 | DNA Change | Protein Change | rsID        | N Extreme Carriers | HDL-C in Extremes | N RS Carriers | HDL-C in the RS             | Observed in Extremes and RS | Previously Reported <sup>12</sup> |
|---------------|------------|----------------|-------------|--------------------|-------------------|---------------|-----------------------------|-----------------------------|-----------------------------------|
| 107546652     | c.6730G>A  | p.(Val2244Ile) | rs144588452 | 1                  | 41                |               |                             |                             |                                   |
| 107547734     | c.6588G>C  | p.(In2196His)  | rs564764153 |                    |                   | 1             | 68                          |                             |                                   |
| 107547804     | c.6518G>A  | p.(Arg2173Gln) | rs375968445 | 1                  | 96                |               |                             |                             |                                   |
| 107548583     | c.6397A>T  | p.(Asn2133Tyr) |             |                    |                   | 1             | 42                          |                             |                                   |
| 107550221     | c.6184G>A  | p.(Gly2062Arg) |             |                    |                   | 1             | 60                          |                             |                                   |
| 107550823     | c.5953C>T  | p.(His1985Tyr) |             |                    |                   | 1             | 23                          |                             |                                   |
| 107554263     | c.5774G>A  | p.(Arg1925Gln) | rs142688906 | 3                  | 30;115;<br>85     | 8             | 69;64;58;74;<br>49;47;40;53 | ✓                           |                                   |
| 107555536     | c.5552G>A  | p.(Arg1851Gln) |             |                    |                   | 1             | 54                          |                             |                                   |
| 107555551     | c.5537G>T  | p.(Trp1846Leu) |             |                    |                   | 1             | 42                          |                             |                                   |
| 107555570     | c.5518T>C  | p.(Phe1840Leu) |             |                    |                   | 1             | 52                          |                             |                                   |
| 107556776     | c.5398A>C  | p.(Asn1800His) | rs146292819 |                    |                   | 3             | 29;26;41                    |                             | ✓                                 |
| 107556782     | c.5392A>G  | p.(Asn1798Asp) |             | 1                  | 26                |               |                             |                             |                                   |
| 107558450     | c.5266G>A  | p.(Ala1756Thr) | rs142382023 |                    |                   | 1             | 41                          |                             |                                   |
| 107560784     | c.5039G>A  | p.(Arg1680Gln) | rs150125857 |                    |                   | 2             | 37;36                       |                             | ✓                                 |
| 107560803     | c.5020G>A  | p.(Val1674Ile) | rs138422574 |                    |                   | 2             | 46;43                       |                             |                                   |
| 107560830     | c.4993A>G  | p.(Met1665Val) |             | 1                  | 33                |               |                             |                             |                                   |
| 107566973     | c.4493A>G  | p.(Gln1498Arg) |             | 1                  | 41                |               |                             |                             |                                   |
| 107568532     | c.4454C>T  | p.(Pro1485Leu) |             | 1                  | 31                |               |                             |                             |                                   |
| 107574868     | c.4037G>A  | p.(Gly1346Glu) |             | 1                  | 41                |               |                             |                             |                                   |
| 107574875     | c.4030C>T  | p.(Arg1344Trp) | rs193087674 | 1                  | 40                |               |                             |                             |                                   |
| 107576732     | c.3763A>C  | p.(Ser1255Arg) | rs41436749  | 1                  | 41                |               |                             |                             |                                   |
| 107576738     | c.3757G>A  | p.(Glu1253Lys) | rs138056193 |                    |                   | 1             | 63                          |                             |                                   |
| 107578608     | c.3554A>G  | p.(Asn1185Ser) | rs148328750 | 1                  | 82                | 1             | 85                          | ✓                           |                                   |
| 107578618     | c.3544G>A  | p.(Ala1182Thr) | rs143180998 |                    |                   | 4             | 72;38;64;49                 |                             |                                   |
| 107578620     | c.3542C>T  | p.(Ser1181Phe) | rs76881554  |                    |                   | 6             | 60;38;50;48;<br>53;44       |                             | ✓                                 |
| 107579633     | c.3515A>G  | p.(Glu1172Gly) | rs142877738 | 1                  | 25                |               |                             |                             |                                   |
| 107579678     | c.3470G>A  | p.(Ser1157Asn) | rs200664068 | 1                  | 36                | 1             | 37                          | ✓                           |                                   |
| 107580963     | c.3443C>T  | p.(Thr1148Ile) |             | 1                  | 30                |               |                             |                             |                                   |
| 107580991     | c.3415C>G  | p.(Leu1139Val) |             | 1                  | 126               |               |                             |                             |                                   |
| 107582258     | c.3053A>G  | p.(Asp1018Gly) | rs140365800 | 1                  | 103               | 1             | 30                          | ✓                           |                                   |
| 107582316     | c.2995C>T  | p.(Arg999Cys)  | rs138735406 | 1                  | 42                |               |                             |                             |                                   |
| 107584945     | c.2669G>T  | p.(Cys887Phe)  | rs187652566 | 1                  | 105               |               |                             |                             |                                   |
| 107588062     | c.2444A>G  | p.(Glu815Gly)  | rs145582736 | 1                  | 26                |               |                             |                             | ✓                                 |
| 107588129     | c.2377T>C  | p.(Tyr793His)  |             | 1                  | 120               |               |                             |                             |                                   |

|           |           |               |             |    |                                           |    |                                                                                    |   |   |
|-----------|-----------|---------------|-------------|----|-------------------------------------------|----|------------------------------------------------------------------------------------|---|---|
| 107589238 | c.2328G>C | p.(Lys776Asn) | rs138880920 | 7  | 23;34;41;<br>113;106;<br>30;29            | 7  | 62;70;34;54;<br>31;46;46                                                           | ✓ |   |
| 107589246 | c.2320A>C | p.(Thr774Pro) | rs35819696  | 5  | 23;123;<br>81;29;35                       | 21 | 48;45;26;75;<br>56;75;75;53;<br>44;65;52;53;<br>64;28;32;44;<br>62;36;43;47;<br>59 | ✓ |   |
| 107591334 | c.1978G>A | p.(Val660Met) |             | 1  | 101                                       |    |                                                                                    |   |   |
| 107591390 | c.1922C>T | p.(Pro641Leu) |             |    |                                           | 1  | 53                                                                                 |   |   |
| 107593318 | c.1780G>A | p.(Ala594Thr) | rs199655961 |    |                                           | 1  | 46                                                                                 |   |   |
| 107593329 | c.1769G>T | p.(Trp590Leu) | rs137854496 | 1  | 41                                        |    |                                                                                    |   |   |
| 107593350 | c.1748T>C | p.(Phe583Ser) |             |    |                                           | 1  | 37                                                                                 |   |   |
| 107594878 | c.1486C>T | p.(Arg496Trp) | rs147675550 | 2  | 30;26                                     | 3  | 86;36;37                                                                           | ✓ | ✓ |
| 107595026 | c.1338C>G | p.(Asp446Glu) | rs148314522 | 1  | 40                                        | 2  | 40;95                                                                              | ✓ |   |
| 107599281 | c.1291C>G | p.(Gln431Glu) |             |    |                                           | 1  | 46                                                                                 |   |   |
| 107599296 | c.1276T>C | p.(Phe426Leu) | rs201586430 |    |                                           | 1  | 49                                                                                 |   |   |
| 107599376 | c.1196T>C | p.(Val399Ala) | rs9282543   | 10 | 34;27;41;<br>34;31;29;<br>27;30;31;<br>29 | 13 | 51;75;82;56;<br>50;57;40;32;<br>46;73;55;45;<br>39                                 | ✓ |   |
| 107599797 | c.1106G>A | p.(Arg369His) | rs370223805 |    |                                           | 1  | 39                                                                                 |   |   |
| 107602586 | c.1028C>T | p.(Ala343Val) | rs200030513 |    |                                           | 1  | 34                                                                                 |   |   |
| 107607822 | c.749C>T  | p.(Pro250Leu) | rs201134913 | 1  | 41                                        | 1  | 59                                                                                 | ✓ |   |
| 107607828 | c.743C>T  | p.(Pro248Leu) |             | 1  | 30                                        |    |                                                                                    |   |   |
| 107624006 | c.497A>G  | p.(Lys106Arg) | rs377248142 |    |                                           | 1  | 55                                                                                 |   |   |
| 107624036 | c.467G>T  | p.(Gly156Val) | rs369793332 |    |                                           | 1  | 54                                                                                 |   |   |
| 107645341 | c.400C>G  | p.(Gln134Glu) |             |    |                                           | 1  | 55                                                                                 |   |   |
| 107645379 | c.92G>T   | p.(Ser121Thr) |             | 1  | 29                                        |    |                                                                                    |   |   |
| 107646756 | c.254C>T  | p.(Pro25Leu)  | rs145183203 |    |                                           | 2  | 51;41                                                                              |   |   |
| 107651451 | c.92G>T   | p.(Trp31Leu)  |             | 1  | 74                                        |    |                                                                                    |   |   |

**Table S2. Power estimates from simulation mimicking real data.** For common variants, a case/control and random sample give the same effect, but for rare variants, extremes are more powerful, even with a reduced sample size. This is more pronounced when with larger effects. Scenario A: Rare variants were simulated to have 1-SD effects, all same direction; Scenario B: rare variants were simulated to have ½-SD effects, all same direction; and Scenario C: ½ of the variant effects are simulated to have a ½-SD effect and ½ of the variant effects are simulated to have a 1.5-SD effect.

|               | <b>N</b> | <b>Common variant test</b> | <b>Rare variant test Scenario A</b> | <b>Rare variant test Scenario B</b> | <b>Rare variant test Scenario C</b> |
|---------------|----------|----------------------------|-------------------------------------|-------------------------------------|-------------------------------------|
| Random Sample | 3000     | 0.511                      | 0.457                               | 0.126                               | 0.296                               |
| Case-Control  | 350/350  | 0.526                      | 0.539                               | 0.125                               | 0.33                                |
| All           | 7000     | 0.877                      | 0.640                               | 0.193                               | 0.442                               |

**Table S3. Type I error estimates from simulation comparing sampling strategies.** Estimates of type I error based on 1,000 replicates. The 95% confidence interval around 0.05 is 0.036-0.063.

| <b>Sampling</b>                                  | <b>Common variant test</b> | <b>Rare variant test</b> |
|--------------------------------------------------|----------------------------|--------------------------|
| Random sample of 1100                            | 0.053                      | 0.033                    |
| Random sample of 2100                            | 0.035                      | 0.046                    |
| Random sample 5100                               | 0.044                      | 0.045                    |
| Random sample of 10100                           | 0.044                      | 0.045                    |
| c/c 100/100 from 5% tail                         | 0.039                      | 0.044                    |
| c/c 100/100 from 1% tail                         | 0.062                      | 0.040                    |
| c/c 100/100 from 0.1% tail                       | 0.050                      | 0.046                    |
| c/c 100/100 from 0.01% tail                      | 0.046                      | 0.046                    |
| c/c 100 from 5% tail and 1,000 random samples    | 0.054                      | 0.052                    |
| c/c 100 from 1% tail and 1,000 random samples    | 0.051                      | 0.049                    |
| c/c 100 from 0.1% tail and 1,000 random samples  | 0.046                      | 0.046                    |
| c/c 100 from 0.01% tail and 1,000 random samples | 0.044                      | 0.040                    |

**Figure S1. Proportion of functional variants observed in extremes versus random sample design.**

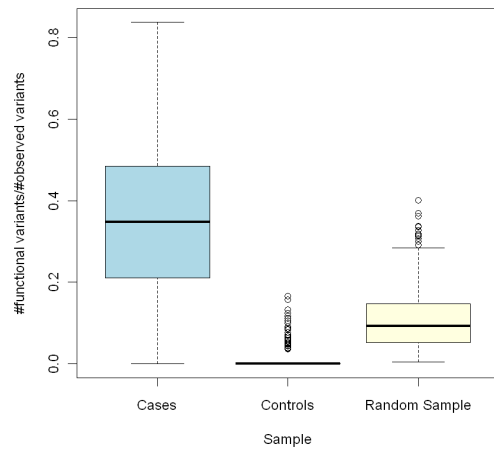

### Figure S2. Power estimates from the fixed sample size simulation.

Samples were simulated with equal numbers for the population-based random sample (RS) and the extreme case-control (CC) sample. Threshold, the threshold for selecting the extreme samples; RV, rare variant test; CV, common variant test; sigma, the standard deviation effect of each of the functional rare variants. The probably that specific class of mutations are function was simulated as follows: Model 1 – prob=0.3, poss=0.05, benign=0.1; Model 2 – prob=0.5, poss=0.2, benign=0.05 (increases the amount of variation that is functional); Model 3 – prob=0.1, poss=0.01, benign=0.001 (decreases the amount of variation that is functional).

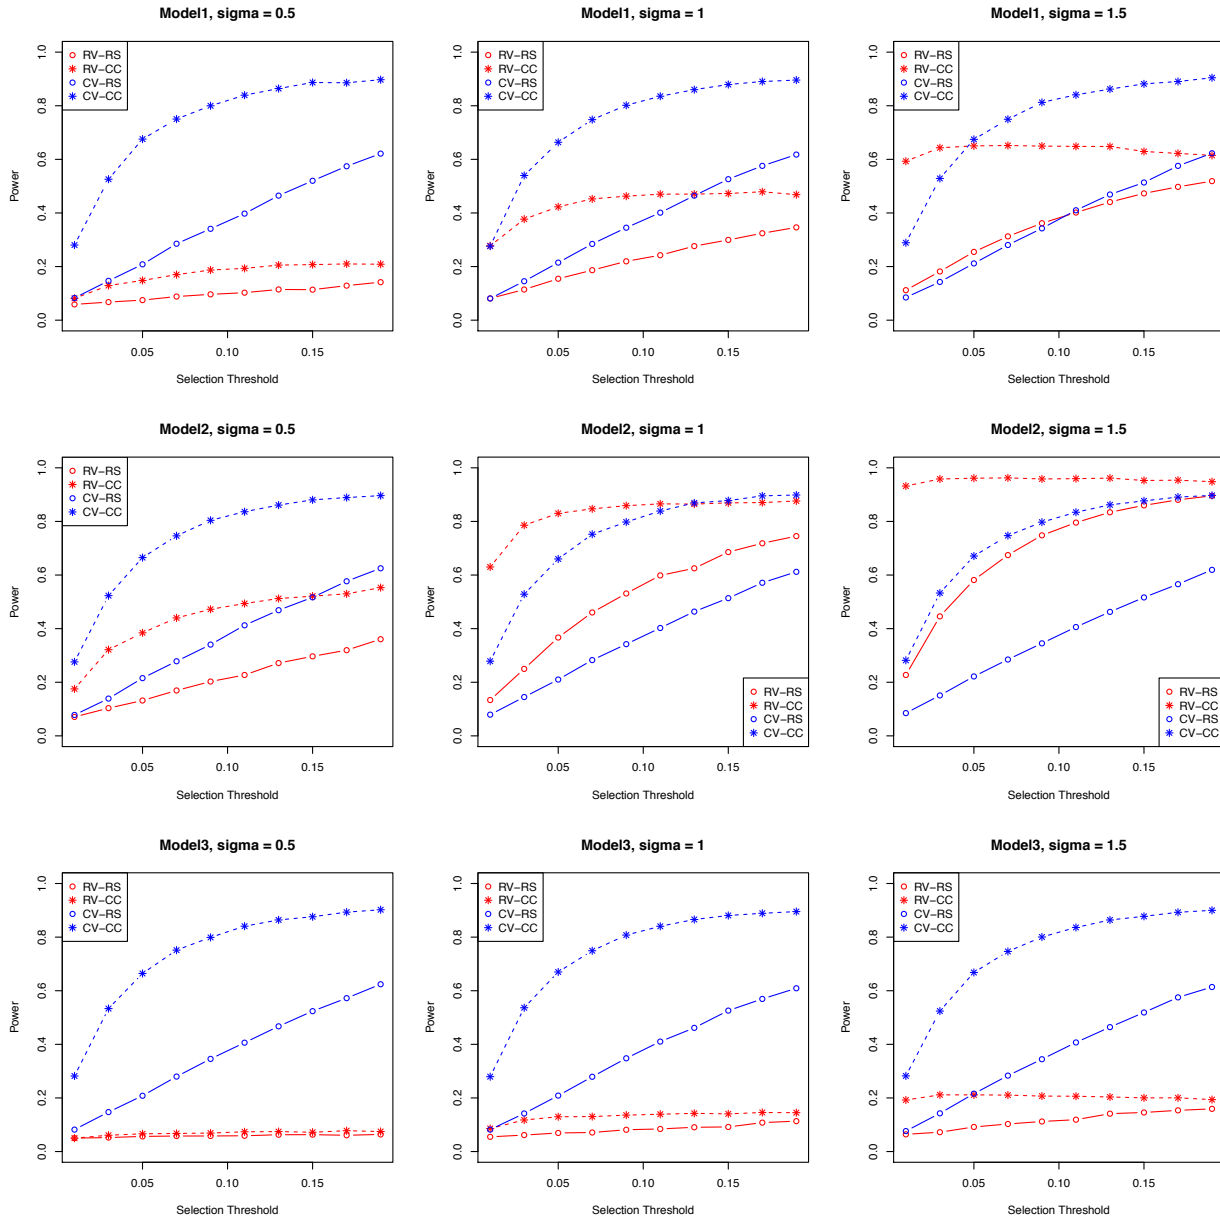

Supplement: ejhg2015197x1.pdf [file ejhg2015197x1.pdf]
